# Supplementary material for: Apparent size and morphology of bacterial microcompartments varies with technique
Source: PubMed Central journal article supplement (PMC7062276; doi:10.1371/journal.pone.0226395), 2020-03-09
Supplement: pone.0226395.s007.pdf [file pone.0226395.s007.pdf]

## S2 File: Calculation of Average Measured Diameter of a Sphere

We wish to relate the average diameter of a sphere measured by ultra-thin sectioning to the actual diameter of a spherical particle. To calculate the average measured diameter,  $D_{\text{measured}}$  of a sphere for which we know the actual diameter,  $D_{\text{actual}}$ , we use the equation for averaging a function over a volume.

$$f_{\text{avg}} = \frac{1}{\text{Vol}} \int_V f dV \quad (1)$$

In our case, we average over the function that defines the cross-sectional diameter of the sphere at any distance from the sphere's center,  $d(r)$  (**S2 Fig**). This function can be defined as

$$d(r) = 2\sqrt{\left(\frac{D_{\text{actual}}}{2}\right)^2 - r^2} \quad (2)$$

Realizing that the volume we are integrating over is a sphere, we can write

$$\text{Vol} = \frac{4\pi}{3} \left(\frac{D_{\text{actual}}}{2}\right)^3 \quad (3)$$

Finally, we use spherical coordinates to evaluate the volume integral, yielding the expression

$$D_{\text{measured}} = \frac{6}{\pi D_{\text{actual}}^3} \int_0^\pi \sin(\phi) d\phi \int_0^{2\pi} d\theta \int_0^{D_{\text{actual}}/2} 2\sqrt{\left(\frac{D_{\text{actual}}}{2}\right)^2 - r^2} r^2 dr \quad (4)$$

Which simplifies to

$$D_{\text{measured}} = \frac{48}{D_{\text{actual}}^3} \int_0^{D_{\text{actual}}/2} \sqrt{\left(\frac{D_{\text{actual}}}{2}\right)^2 - r^2} r^2 dr \quad (5)$$

$$= \frac{3}{8} D_{\text{actual}} \left[ \arcsin\left(\frac{2r}{D_{\text{actual}}}\right) - \frac{1}{4} \sin\left(4 \arcsin\left(\frac{2r}{D_{\text{actual}}}\right)\right) \right]_{r=0}^{r=D_{\text{actual}}/2} \quad (6)$$

$$= \frac{3\pi}{16} D_{\text{actual}} \quad (7)$$
