# Supplementary material for: Apparent size and morphology of bacterial microcompartments varies with technique
Source: PubMed Central journal article supplement (PMC7062276; doi:10.1371/journal.pone.0226395), 2020-03-09

**Technical Replicate 1 20181016**

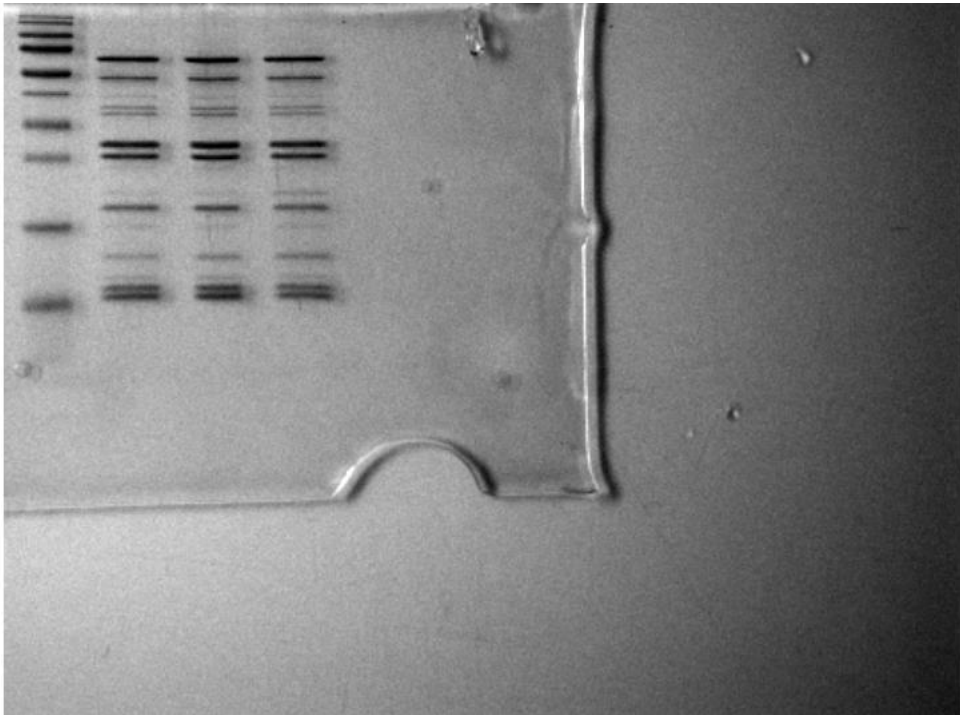

**Technical Replicate 2 20181016**

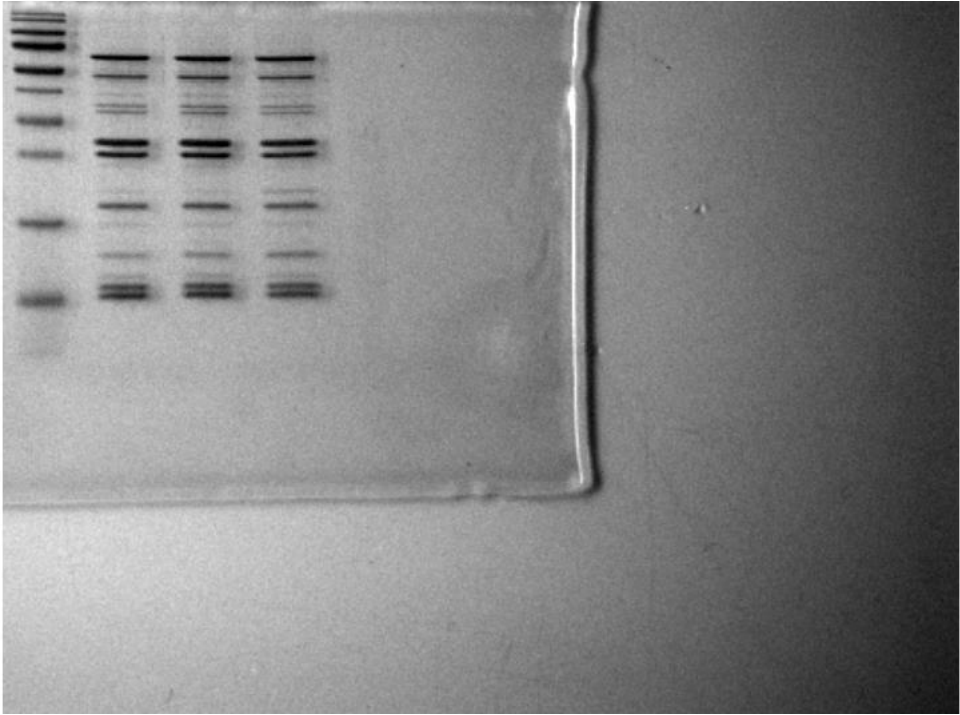

**Technical Replicate 1 20181113**

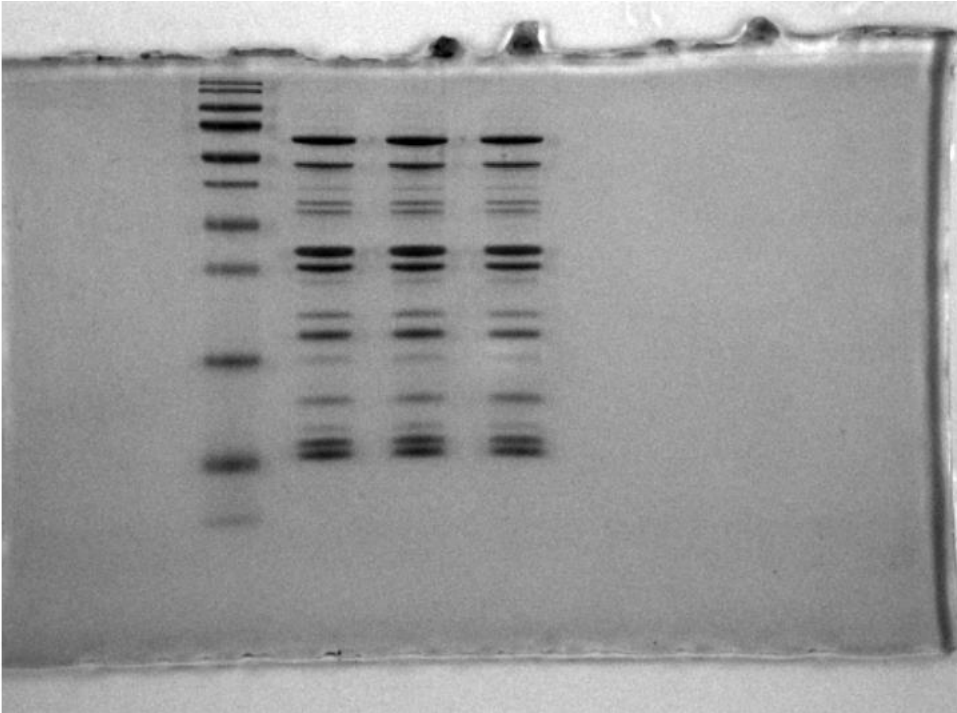

**Technical Replicate 2 20181116**

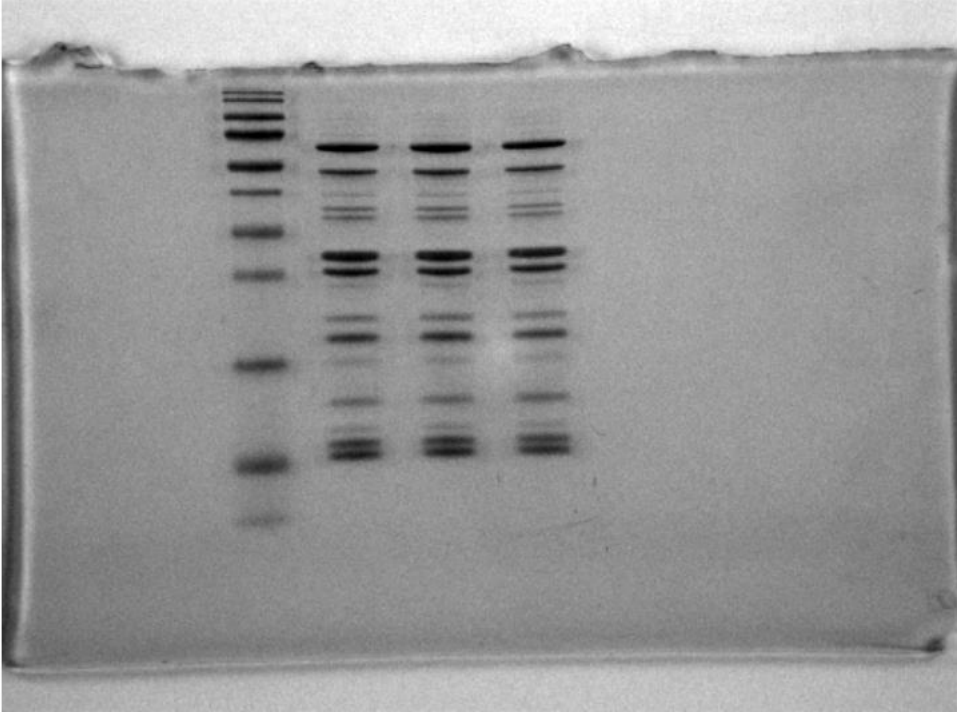

Coomassie 20190208

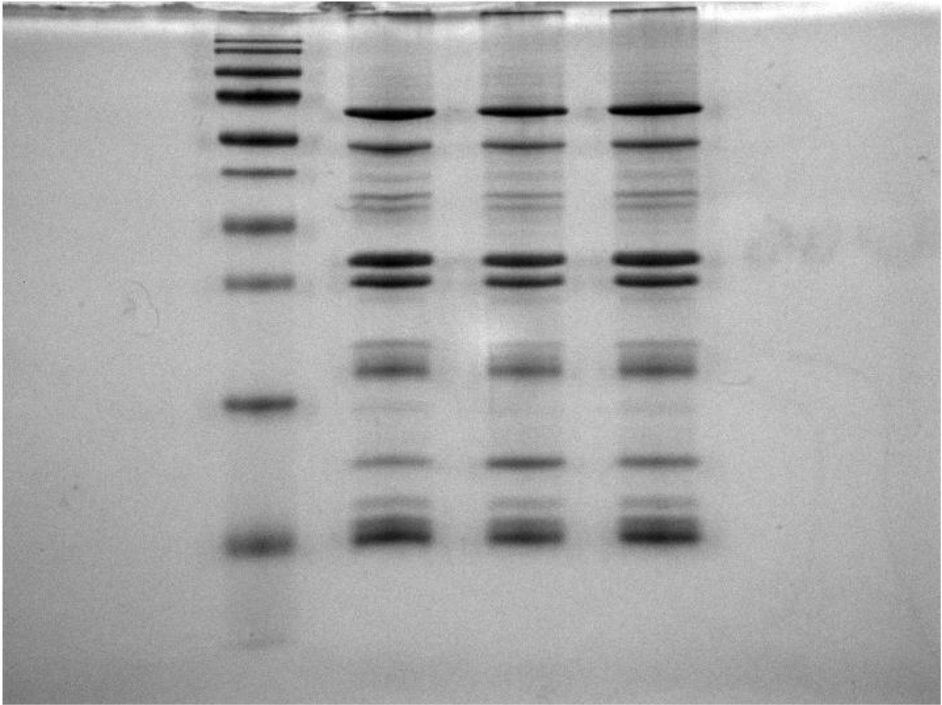

Supplement: pone.0226395.s010.pdf [file pone.0226395.s010.pdf]
